# Supplementary material for: Temporal changes in macrophage phenotype after peripheral nerve injury
Source: PubMed Central journal article supplement (PMC6003127; doi:10.1186/s12974-018-1219-0), 2018-06-15
Supplement: 12974_2018_1219_MOESM1_ESM.pdf [file 12974_2018_1219_MOESM1_ESM.pdf]

**Supplemental Table 1:** Excitation and detection settings for antibodies and conjugates used.

| <b>Antibody target</b>                                        | <b>Conjugate</b> | <b>Excitation laser (nm)</b> | <b>Emission Filters (nm)</b> | <b>Mirror</b> |
|---------------------------------------------------------------|------------------|------------------------------|------------------------------|---------------|
| <b>CD11b</b>                                                  | Pacific Blue     | 405                          | 450/50                       |               |
| <b>Zombie aqua</b>                                            | n/a              | 405                          | 525/50                       | 495LP         |
| <b>CD16/32</b>                                                | BV605            | 405                          | 585/42                       | 570LP         |
| <b>Arg1, CD14</b>                                             | PE               | 532                          | 575/25                       |               |
| <b>Propidium Iodide</b>                                       | n/a              | 532                          | 660/20                       | 640LP         |
| <b>F4/80</b>                                                  | PE-Cy7           | 532                          | 780/40                       | 740LP         |
| <b>Nos2, Ly6G, Siglec F, CD19, CD3e, Thy1.2, Ter119, CD31</b> | APC              | 633                          | 660/20                       |               |
