# Supplementary material for: Temporal changes in macrophage phenotype after peripheral nerve injury
Source: Springer Nature journal article supplement (doi:10.1186/s12974-018-1219-0), 2018-06-15
Supplement: MOESM3 [file 15848962]

Supplemental table 2: NanoString gene expression panels for *in vitro* and *in vivo* experiments

|                   | In vitro panel | In vivo panel | gene name                                           |
|-------------------|----------------|---------------|-----------------------------------------------------|
| genes of interest | Acta2          |               | smooth muscle actin                                 |
|                   | Adgre1         | Adgre1        | adhesion G protein-coupled receptor Eq, a.k.a F4/80 |
|                   | Alox15         | Alox15        | arachidonate 15-lipoxygenase                        |
|                   | Arg1           | Arg1          | arginase 1                                          |
|                   |                | Areg          | amphiregulin                                        |
|                   |                | Birc5         | baculoviral IAP repeat containing 5                 |
|                   | Bdnf           |               | brain derived neurotrophic factor                   |
|                   |                | Card11        | caspase recruitment domain family member 11         |
|                   | Ccl1           |               | C-C motif chemokine ligand 1                        |
|                   | Ccl11          | Ccl11         | C-C motif chemokine ligand 11                       |
|                   | Ccl17          | Ccl17         | C-C motif chemokine ligand 17                       |
|                   | Ccl2           | Ccl2          | C-C motif chemokine ligand 2                        |
|                   | Ccl20          |               | C-C motif chemokine ligand 20                       |
|                   | Ccl22          | Ccl22         | C-C motif chemokine ligand 22                       |
|                   | Ccl24          | Ccl24         | C-C motif chemokine ligand 24                       |
|                   | Ccl3           |               | C-C motif chemokine ligand 3, a.k.a. MIP-1a         |
|                   | Ccl5           | Ccl5          | C-C motif chemokine ligand 5                        |
|                   |                | Ccl7          | C-C motif chemokine ligand 7                        |
|                   | Ccr2           | Ccr2          | C-C motif chemokine receptor 2                      |
|                   | Ccr7           |               | C-C motif chemokine receptor 7                      |
|                   | Cd14           | Cd14          | CD14                                                |
|                   | Cd163          |               | CD163                                               |
|                   | Cd19           | Cd19          | CD19                                                |
|                   | Cd3e           | Cd3e          | CD3e                                                |
|                   |                | Cd300e        | CD300e                                              |
|                   | Cd40           |               | CD40                                                |
|                   |                | Cd51          | CD5 molecule like                                   |
|                   | Cd68           |               | CD68                                                |
|                   | Cd80           |               | CD80                                                |
|                   | Cd86           |               | CD86                                                |
|                   |                | Chil1         | chitinase 3-like 1                                  |
|                   | Chil3          | Chil3         | chitinase 3-like 3                                  |
|                   | Cntf           | Cntf          | ciliary neurotrophic factor                         |
|                   | Col6a1         |               | collagen type VI alpha 1 chain                      |
|                   |                | Col18a1       | collagen type XVIII alpha 1 chain                   |
|                   |                | Col1a1        | collagen type I alpha 1 chain                       |
|                   |                | Col1a2        | collagen type I alpha 2 chain                       |
|                   |                | Col3a1        | collagen type III alpha 1 chain                     |
|                   |                | Cx3cr1        | C-X3-C motif chemokine receptor 1                   |
|                   | Cxcl1          |               | C-X-C motif chemokine ligand 1. a.k.a. KC           |
|                   | Cxcl10         |               | C-X-C motif chemokine ligand 10                     |
|                   | Cxcl11         |               | C-X-C motif chemokine ligand 11                     |
|                   |                | Cxcl12        | C-X-C motif chemokine ligand 12                     |
|                   | Cxcl13         | Cxcl13        | C-X-C motif chemokine ligand 13                     |
|                   |                | Cxcl14        | C-X-C motif chemokine ligand 14                     |
|                   | Cxcl16         | Cxcl16        | C-X-C motif chemokine ligand 16                     |

Supplemental table 2: NanoString gene expression panels for *in vitro* and *in vivo* experiments

|                   | In vitro panel | In vivo panel | gene name                                                             |
|-------------------|----------------|---------------|-----------------------------------------------------------------------|
| genes of interest |                | Cxcl5         | C-X-C motif chemokine ligand 5                                        |
|                   | Cxcl9          | Cxcl9         | C-X-C motif chemokine ligand 9                                        |
|                   |                | Dcstamp       | dendrocyte expressed seven transmembrane protein                      |
|                   | Egf            |               | epidermal growth factor                                               |
|                   | Fcgr2b         |               | Fc fragment of IgG receptor II b, a.k.a. CD32                         |
|                   | Fcgr3          |               | Fc fragment of IgG receptor III, a.k.a. CD16                          |
|                   | Fcrls          |               | Fc receptor-like S, a.k.a. SRAII                                      |
|                   | Fgf1           |               | fibroblast growth factor 1                                            |
|                   | Fgf2           |               | fibroblast growth factor 2                                            |
|                   |                | Fgfr1         | fibroblast growth factor receptor 1                                   |
|                   | Gdnf           | Gdnf          | glial cell derived neurotrophic factor                                |
|                   | Gfap           |               | glial fibrillary acidic protein                                       |
|                   | Hgf            | Hgf           | hepatocyte growth factor                                              |
|                   | Ifng           |               | interferon gamma                                                      |
|                   | Ifngr1         | Ifngr1        | interferon gamma receptor 1                                           |
|                   | Igf1           | Igf1          | insulin like growth factor 1                                          |
|                   | Igf2           |               | insulin like growth factor 2                                          |
|                   | Il10           | Il10          | interleukin 10                                                        |
|                   | Il10ra         |               | interleukin 10 receptor subunit alpha                                 |
|                   |                | Il10rb        | interleukin 10 receptor subunit beta                                  |
|                   | Il12b          | Il12b         | interleukin 12b                                                       |
|                   | Il13ra1        |               | interleukin 13 receptor subunit alpha 1                               |
|                   | Il17a          |               | interleukin 17a                                                       |
|                   | Il1a           | Il1a          | interleukin 1 alpha                                                   |
|                   | Il1b           | Il1b          | interleukin 1 beta                                                    |
|                   | Il1rn          |               | interleukin 1 receptor antagonist                                     |
|                   | Il2            |               | interleukin 2                                                         |
|                   | Il22           |               | interleukin 22                                                        |
|                   | Il23a          |               | interleukin 23 subunit alpha                                          |
|                   | Il27           |               | interleukin 27                                                        |
|                   | Il4ra          | Il4ra         | interleukin 4 receptor alpha                                          |
|                   | Il5            |               | interleukin 7                                                         |
|                   | Il6            | Il6           | interleukin 8                                                         |
|                   | Irf3           | Irf3          | interferon regulatory factor 3                                        |
|                   | Irf4           |               | interferon regulatory factor 4                                        |
|                   | Irf5           | Irf5          | interferon regulatory factor 5                                        |
|                   | Itgam          | Itgam         | integrin subunit alpha M, a.k.a. CD11b                                |
|                   |                | Itgax         | integrin subunit alpha X                                              |
|                   |                | Jun           | Jun transcription factor family                                       |
|                   | Lama5          |               | laminin subunit alpha 5                                               |
|                   | Lamc2          |               | laminin subunit gamma 2                                               |
|                   | Lgals3         | Lgals3        | galectin 3, a.k.a. Mac-2                                              |
|                   | Lif            |               | LIF, interleukin 6 family cytokine, a.k.a. leukemia inhibitory factor |
|                   |                | Ly6a          | lymphocyte antigen 6 complex, locus A                                 |

Supplemental table 2: NanoString gene expression panels for *in vitro* and *in vivo* experiments

|                   | In vitro panel | In vivo panel                          | gene name                                          |
|-------------------|----------------|----------------------------------------|----------------------------------------------------|
| genes of interest | Ly6c1          |                                        | lymphocyte antigen 6 complex, locus C1             |
|                   | Ly6g           | Ly6g                                   | lymphocyte antigen 6 complex, locus g, a.k.a. Gr1  |
|                   |                | Ly6i                                   | lymphocyte antigen 6 complex, locus I              |
|                   | Marco          |                                        | macrophage receptor with collagenous structure     |
|                   |                | Mmp12                                  | matrix metalloproteinase 12                        |
|                   |                | Mmp13                                  | matrix metalloproteinase 13                        |
|                   |                | Mmp27                                  | matrix metalloproteinase 27                        |
|                   |                | Myd88                                  | myeloid differentiation primary response 88        |
|                   | Mrc1           | Mrc1                                   | mannose receptor C-type 1, a.k.a. CD206            |
|                   | Msr1           | Msr1                                   | macrophage scavenger receptor 1, a.k.a. SRAI       |
|                   | Nfil3          |                                        | nuclear factor, interleukin 3 regulated            |
|                   | Nfkbiz         | Nfkbiz                                 | NFKB inhibitor zeta                                |
|                   | Ngf            |                                        | nerve growth factor                                |
|                   | Ngfr           |                                        | nerve growth factor receptor. a.k.a. p75NTR        |
|                   | Nos2           | Nos2                                   | nitric oxide synthase 2                            |
|                   |                | Nrg1                                   | neuregulin 1                                       |
|                   | Ntf3           |                                        | neurotrophin 3                                     |
|                   | Ntf5           |                                        | neurotrophin 5                                     |
|                   |                | Pak1                                   | p21 (RAC1) activated kinase 1                      |
|                   | Pdgfb          | Pdgfb                                  | platelet derived growth factor subunit B           |
|                   |                | Pecam1                                 | platelet and endothelial cell adhesion molecule 1  |
|                   | Pf4            | Pf4                                    | platelet factor 4, a.k.a. CXCL4                    |
|                   | Pparg          |                                        | peroxisome proliferator activated receptor gamma   |
|                   |                | Ppbp                                   | pro-platelet basic protein                         |
|                   | Retnla         | Retnla                                 | resistin like alpha, a.k.a. Fizz1                  |
|                   | Rtn4r          |                                        | reticulon 4 receptor, a.k.a. NGR                   |
|                   |                | S100a9                                 | S100 calcium binding protein A9                    |
|                   | S100b          |                                        | S100 calcium binding protein B                     |
|                   |                | Saa3                                   | serum amyloid A3                                   |
|                   | Sbno2          |                                        | strawberry notch homolog 2                         |
|                   |                | Siglece                                | sialic acid binding Ig like lectin E               |
|                   | Siglecf        |                                        | sialic acid binding Ig like lectin F               |
|                   | Socs1          | Socs1                                  | suppressor of cytokine signaling 1                 |
|                   | Socs2          |                                        | suppressor of cytokine signaling 2                 |
|                   | Socs3          | Socs3                                  | suppressor of cytokine signaling 3                 |
|                   | Stat1          | Stat1                                  | signal transducer and activator of transcription 1 |
|                   | Stat2          | Stat2                                  | signal transducer and activator of transcription 2 |
|                   | Stat3          | Stat3                                  | signal transducer and activator of transcription 3 |
|                   | Stat6          | Stat6                                  | signal transducer and activator of transcription 6 |
|                   | Tgfb1          | Tgfb1                                  | transforming growth factor beta 1                  |
|                   | Tgm2           |                                        | transglutaminase 2                                 |
| Thy1              | Thy1           | Thy1 cell surface antigen, a.k.a. CD90 |                                                    |
| Tlr1              |                | toll like receptor 1                   |                                                    |
| Tlr2              | Tlr2           | toll like receptor 2                   |                                                    |
| Tlr4              | Tlr4           | toll like receptor 4                   |                                                    |

Supplemental table 2: NanoString gene expression panels for *in vitro* and *in vivo* experiments

|                   | In vitro panel | In vivo panel | gene name                                     |
|-------------------|----------------|---------------|-----------------------------------------------|
| genes of interest | Tlr8           | Tlr8          | toll like receptor 8                          |
|                   | Tnf            | Tnf           | tumor necrosis factor                         |
|                   | Vegfa          | Vegfa         | vascular endothelial growth factor A          |
|                   | Vim            |               | vimentin                                      |
| House-keeping     | Actb           | Actb          | actin beta                                    |
|                   | Ankrd27        | Ankrd27       | ankyrin repeat domain 27                      |
|                   | B2m            |               | beta 2 microglobulin                          |
|                   | Gapdh          | Gapdh         | glyceraldehyde-3-phosphate dehydrogenase      |
|                   | Hmbs           |               | hydroxymethylbilane synthase                  |
|                   | Hprt           |               | hypoxanthine phosphoribosyltransferase 1      |
|                   | Rictor         | Rictor        | RPTOR independent companion of MTOR complex 2 |
|                   | Tbp            | Tbp           | TATA-box binding protein                      |
