# Supplementary material for: Temporal changes in macrophage phenotype after peripheral nerve injury
Source: J Neuroinflammation. 2018 Jun 15;15:185. doi: 10.1186/s12974-018-1219-0 (PMC6003127; doi:10.1186/s12974-018-1219-0)
Supplement: Supplementary file 4 — Table S3. Survival after intraperitoneal endotoxin injection1. 1 Survival times of 5 mouse strains exposed to 50 mg/kg LPS I.P. Gehan–Breslow–Wilcoxon test and Mantel–Haenszel hazard ratios were calculated in GraphPad Prism. Ifngr1−/− and IL10rb−/− were compared to their background strain C57BL/6J. Il4ra−/− were compared to their background strain, BALB/cJ. C57BL/6J were compared to BALB/cJ. (PDF 36 kb) [file 12974_2018_1219_MOESM4_ESM.pdf]

**Supplemental Table 3:** Survival after intraperitoneal endotoxin injection <sup>1</sup>

|                             | N  | Median survival (h) | Hazard ratio (95% CI of ratio) | p-value |
|-----------------------------|----|---------------------|--------------------------------|---------|
| <b>Ifngr1<sup>-/-</sup></b> | 10 | 23.5                | 2.53 (0.941 – 6.78)            | 0.046   |
| <b>Il10rb<sup>-/-</sup></b> | 15 | 9                   | 0.178 (0.0672 – 0.472)         | <0.0001 |
| <b>C57BL/6J</b>             | 14 | 15                  | 0.630 (0.276 – 1.44)           | 0.031   |
| <b>BALB/cJ</b>              | 17 | 20                  | -                              | -       |
| <b>Il4ra<sup>-/-</sup></b>  | 14 | 15                  | 0.273 (0.108 – 0.692)          | 0.014   |

<sup>1</sup> Survival times of 5 mouse strains exposed to 50 mg/kg LPS I.P. Gehan-Breslow-Wilcoxon test and Mantel-Haenszel hazard ratios were calculated in GraphPad Prism. *Ifngr1<sup>-/-</sup>* and *IL10rb<sup>-/-</sup>* were compared to their background strain C57BL/6J. *Il4ra<sup>-/-</sup>* were compared to their background strain, BALB/cJ. C57BL/6J were compared to BALB/cJ.
